# Supplementary material
Source: HighWire-hosted journal article supplement (https://erj.ersjournals.com/content/53/3/1801609)
Supplement: inline-supplementary-material-2 [file inline-supplementary-material-2.xlsx]

## Sheet: Mutations in 10 PAH genes
	Supplementary Dataset 1 Rare variants and mutations in 10 previously reported PAH risk genes. Abbreviations: 1000G denotes 1000 Genome Project; ExAC denotes Exome Aggregation Consortium; EAS denotes East-Asia; Het denotes heterozygous; Hom denotes homozygous. †: these variant located in or nearby the mutation site annocated by HGMD, but the mutation type or the substitution of amino acid is the s…
	Gene	Coordinate	Genotype	Coding DNA change	Protein change	SIFT, Polyphen2, MutationTaster, CADD	gerp++gt2	Allele frequency in 1000G_Chinese (n=301)	Allele frequency in ExAC_EAS (n=4327)	Allele frequency in Novo Zhonghua (n=1920)	Clinvar	HGMD	Previous reported pathogenic mutation （reference）	The number of IPAH cases carrying the rare variant or mutation
	ACVRL1	12:52307481_G>A	Het	c.G452A	p.R151H	T|B,B|N|19.28	3.7	0	0	.	.	.	.	1
	ACVRL1†	12:52307822_C>G	Het	c.C590G	p.T197R	D|D,D|D|32	5.18	.	.	.	.	c.590C>T | p.T197I	PMID:16752392	1
	ACVRL1	12:52308232_G>T	Het	c.G635T	p.R212L	D|D,D|D|33	3.95	.	.	.	.	.	.	1
	ACVRL1	12:52308253_G>A	Het	c.G656A	p.G219D	D|D,D|D|31	4.85	.	.	.	.	c.656G>A | p.G219D	PMID:16429404	1
	ACVRL1	12:52308265_G>T	Het	c.G668T	p.G223V	D|D,D|D|28.5	3.97	.	.	.	.	.	.	1
	ACVRL1	12:52308274_T>A	Het	c.T677A	p.V226E	D|D,D|D|33	4.85	.	.	.	.	c.677T>A | p.V226E	PMID:20414677	1
	ACVRL1	12:52309167_G>C	Het	c.G931C	p.A311P	D|D,D|D|28.3	5.09	.	.	.	.	.	.	1
	ACVRL1	12:52309267_G>T	Het	c.G1031T	p.C344F	D|D,D|D|33	5.09	.	.	.	.	c.1031G>T | p.C344F || c.1031G>A | p.C344Y	PMID:12114496|PMID:23124896|PMID:10767348	1
	ACVRL1	12:52309906_G>A	Het	c.G1135A	p.E379K	D|D,D|D|32	4.98	.	.	.	Pathogenic/Likely pathogenic	c.1135G>A | p.E379K	PMID:15024723|PMID:22991266	1
	ACVRL1	12:52309969_G>A	Het	c.G1198A	p.A400T	D|D,D|D|34	4.98	.	.	.	.	.	.	1
	ACVRL1	12:52310002_C>T	Het	c.C1231T	p.R411W	D|D,D|A|35	4.98	.	.	.	Pathogenic	c.1231C>T | p.R411W	PMID:11484689|PMID:23124896|PMID:20501893	1
	ACVRL1	12:52310003_G>C	Het	c.G1232C	p.R411P	D|D,D|D|34	4.85	.	.	.	Pathogenic	c.1232G>A | p.R411Q || c.1232G>C | p.R411P	PMID:8640225|PMID:20501893|PMID:15024723|PMID:20501893	1
	ACVRL1	12:52312862_A>C	Het	c.A1340C	p.Q447P	T|D,D|D|24.3	4.99	.	.	.	.	.	.	1
	ACVRL1	12:52314571_G>A	Het	c.G1406A	p.R469Q	T|B,B|D|23.6	3.51	.	0.0009	0.000520833	.	.	.	1
	ACVRL1	12:52314583_AC>A	Het	c.1419delC	p.Y473fs	.	.	.	.	.	.	.	.	1
	ACVRL1†	12:52314598_C>T	Het	c.C1433T	p.A478V	T|D,D|D|26.7	4.41	.	.	.	.	c.1433C>A | p.A478D	PMID:22632830	1
	ACVRL1	12:52314600_C>T	Het	c.C1435T	p.R479X	.|.,.|D|43	4.41	.	.	.	Pathogenic	c.1435C>T | p.R479*	PMID:15024723|PMID:23722869	1
	ACVRL1	12:52314601_G>T	Het	c.G1436T	p.R479L	D|D,D|D|34	4.41	.	.	.	.	c.1436G>A | p.R479Q || c.1436G>T | p.R479L || c.1436G>C | p.R479P	PMID:16470787|PMID:15024723|PMID:20414677	1
	ACVRL1	12:52314616_G>A	Het	c.G1451A	p.R484Q	D|D,D|D|33	4.41	.	.	.	Pathogenic	c.1451G>A | p.R484Q || c.1451G>T | p.R484L	PMID:15687131|PMID:21378382|PMID:20501893|PMID:18498373	1
	ACVRL1	12:52307116_G>A	Het	c.G295A	p.V99M	D|P,D|D|22.2	4.52	0.00166113	0.0003	0.000520833	.	.	.	2
	ACVRL1†	12:52309897_A>C	Het	c.A1126C	p.M376L	D|D,D|D|26.8	4.98	.	.	.	.	c.1126A>G | p.M376V	PMID:15024723	2
	BMPR1B	4:96044963_T>C	Het	c.T352C	p.F118L	T|B,B|D|14.88	4.35	.	.	.	.	.	.	1
	BMPR1B	4:96045029_G>T	Het	c.G418T	p.V140F	T|B,B|D|22.6	4.83	.	.	.	.	.	.	1
	BMPR1B	4:96051163_G>C	Het	c.G736C	p.E246Q	D|D,D|D|27.7	5.74	.	0.0002	0.000260417	.	.	.	1
	BMPR1B	4:96069934_G>A	Het	c.G1112A	p.R371Q	D|P,D|D|33	5.55	0	0.0006	0.000520833	Uncertain significance	.	.	1
	BMPR2	2:203242245_G>A	Het	c.G48A	p.W16X	.|.,.|A|35	2.47	.	.	.	Pathogenic	c.48G>A | p.W16*	PMID:18356561|PMID:19324947	1
	BMPR2	2:203242274_G>C	Het	c.76+1G>C	.	.|.,.|D|23.2	5.26	.	.	.	.	.	.	1
	BMPR2	2:203329557_T>G	Het	c.T102G	p.C34W	D|D,D|D|27.5	4.29	.	.	.	.	.	.	1
	BMPR2	2:203329557_TG>T	Het	c.103delG	p.A35fs	.	.	.	.	.	.	.	.	1
	BMPR2†	2:203329571_CG>C	Het	c.117delG	p.P39fs	.	.	.	.	.	.	c.116delC	PMID:18503968	1
	BMPR2	2:203329615_GA>G	Het	c.161delA	p.E54fs	.	.	.	.	.	.	.	.	1
	BMPR2†	2:203329633_T>C	Het	c.T178C	p.C60R	D|D,D|D|26.7	5.44	.	.	.	Pathogenic	c.178T>G | p.C60G	PMID:21737554	1
	BMPR2	2:203329633_T>G	Het	c.T178G	p.C60G	D|D,D|D|26.2	5.44	.	.	.	Pathogenic	c.178T>G | p.C60G	PMID:21737554	1
	BMPR2†	2:203329655_A>C	Het	c.A200C	p.Y67S	D|P,D|D|26.6	5.44	.	.	.	.	c.200A>G | p.Y67C || c.200dupA	PMID:15146475|PMID:25688877|PMID:25187962|PMID:23579436	1
	BMPR2	2:203332249_G>A	Het	c.G255A	p.W85X	.|.,.|A|38	5.38	.	.	.	Pathogenic	c.255G>A | p.W85*	PMID:16429395|PMID:25612240|PMID:25525159	1
	BMPR2†	2:203332289_T>A	Het	c.T295A	p.C99S	D|D,D|D|26.4	4.2	.	.	.	.	c.295T>C | p.C99R	PMID:16429395	1
	BMPR2	2:203332290_G>A	Het	c.G296A	p.C99Y	D|D,D|D|28.0	5.38	.	.	.	Pathogenic	.	.	1
	BMPR2†	2:203332332_AC>A	Het	c.339delC	p.Y113fs	.	.	.	.	.	.	c.338A>G | p.Y113C || c.338dupA	PMID:21737554|PMID:23675998|PMID:23579436|PMID:25612240	1
	BMPR2	2:203332338_T>C	Het	c.T344C	p.F115S	D|D,D|D|28.5	5.38	.	.	.	.	.	.	1
	BMPR2	2:203332343_T>C	Het	c.T349C	p.C117R	D|D,D|D|26.5	5.38	.	.	.	Pathogenic	c.349T>C | p.C117R	PMID:21737554	1
	BMPR2	2:203332344_G>C	Het	c.G350C	p.C117S	D|D,D|D|26.9	5.38	.	.	.	Pathogenic	c.350G>C | p.C117S || c.350G>A | p.C117Y	PMID:16429395|PMID:11015450|PMID:12045205	1
	BMPR2	2:203332361_T>C	Het	c.T367C	p.C123R	D|D,D|D|26.6	5.38	.	.	.	Pathogenic	c.367T>C | p.C123R || c.367T>A | p.C123S	PMID:11115378|PMID:12045205|PMID:11115378|PMID:12045205	1
	BMPR2	2:203378495_G>GTC	Het	c.472_473insTC	p.V158fs	.	.	.	.	.	.	.	.	1
	BMPR2	2:203378499_CTG>C	Het	c.477_478del	p.S159fs	.	.	.	.	.	.	.	.	1
	BMPR2	2:203383544_G>A	Het	c.622-1G>A	.	.|.,.|D|26.3	6.05	.	.	.	.	.	.	1
	BMPR2	2:203383554_C>T	Het	c.C631T	p.R211X	.|.,.|A|42	6.05	.	.	.	Pathogenic	c.631C>T | p.R211*	PMID:11015450|PMID:25525159	1
	BMPR2	2:203383558_G>A	Het	c.G635A	p.G212D	D|D,D|D|31	6.05	.	.	.	.	.	.	1
	BMPR2	2:203383570_CA>C	Het	c.648delA	p.A216fs	.	.	.	.	.	.	.	.	1
	BMPR2	2:203383670_G>GCCTTTGATGGAACATGA	Het	c.747_748insCCTTTGATGGAACATGA	p.V249fs	.	.	.	.	.	.	.	.	1
	BMPR2	2:203383776_G>T	Het	c.852+1G>T	.	.|.,.|D|25.4	5.65	.	.	.	.	c.852+1G>A	PMID:20534176|PMID:25525159	1
	BMPR2	2:203384808_A>G	Het	c.853-2A>G	.	.|.,.|D|24.8	5.04	.	.	.	Pathogenic	c.853-2A>G	PMID:16429395|PMID:25612240	1
	BMPR2	2:203384918_C>T	Het	c.C961T	p.R321X	.|.,.|A|40	4.22	.	.	.	Pathogenic	c.961C>T | p.R321*	PMID:15591269|PMID:21920918|PMID:23669347	1
	BMPR2	2:203395543_C>T	Het	c.C994T	p.R332X	.|.,.|A|38	4.81	.	.	.	Pathogenic	c.994C>T | p.R332*	PMID:11015450|PMID:25525159	1
	BMPR2	2:203397317_A>AT	Het	c.1139dupT	p.I380fs	.	.	.	.	.	.	.	.	1
	BMPR2	2:203397326_A>AT	Het	c.1148dupT	p.M383fs	.	.	.	.	.	.	.	.	1
	BMPR2	2:203397330_C>T	Het	c.C1151T	p.A384V	D|P,D|D|33	5.52	.	.	.	Pathogenic	c.1151C>T | p.A384V	PMID:23675998	1
	BMPR2†	2:203397375_C>T	Het	c.C1196T	p.S399L	D|P,D|D|33	5.52	.	.	.	.	c.1196C>G | p.S399*	PMID:16429395|PMID:25525159	1
	BMPR2	2:203397392_G>A	Het	c.G1213A	p.D405N	D|D,D|D|33	5.52	.	.	.	.	.	.	1
	BMPR2	2:203397408_G>A	Het	c.G1229A	p.G410E	D|D,D|D|29.2	5.28	.	.	.	.	.	.	1
	BMPR2†	2:203397427_A>G	Het	c.A1248G	p.I416M	D|P,P|D|20.7	.	.	.	.	.	c.1248delA	PMID:11015450	1
	BMPR2	2:203397438_G>A	Het	c.G1259A	p.C420Y	D|D,D|D|31	5.28	.	.	.	Pathogenic	c.1259G>A | p.C420Y	PMID:15146475	1
	BMPR2†	2:203397438_G>T	Het	c.G1259T	p.C420F	D|D,D|D|32	5.28	.	.	.	.	c.1259G>A | p.C420Y	PMID:15146475	1
	BMPR2	2:203397455_G>C	Het	c.G1276C	p.G426R	T|D,D|D|25.9	5.28	.	.	.	Likely pathogenic	.	.	1
	BMPR2	2:203397457_T>C	Het	c.1276+2T>C	.	.|.,.|D|24.6	5.28	.	.	.	.	.	.	1
	BMPR2	2:203407032_A>G	Het	c.1277-2A>G	.	.|.,.|D|23.7	3.98	.	.	.	.	.	.	1
	BMPR2	2:203407066_C>T	Het	c.C1309T	p.Q437X	.|.,.|A|40	5.17	.	.	.	.	.	.	1
	BMPR2	2:203407103_T>G	Het	c.T1346G	p.M449R	D|P,P|D|28.9	5.41	.	.	.	Pathogenic	c.1346T>G | p.M449R	PMID:16728714	1
	BMPR2	2:203417438_G>A	Het	c.1414-1G>A	.	.|.,.|D|24.8	4.83	.	.	.	.	.	.	1
	BMPR2	2:203417478_G>A	Het	c.G1453A	p.D485N	D|D,D|D|33	5.52	.	.	.	Pathogenic	.	.	1
	BMPR2	2:203417484_G>A	Het	c.G1459A	p.D487N	D|D,D|D|33	5.52	.	.	.	.	.	.	1
	BMPR2	2:203417494_C>T	Het	c.C1469T	p.A490V	D|D,D|D|34	5.52	.	.	.	Pathogenic	c.1469C>T | p.A490V	PMID:16429395	1
	BMPR2	2:203417506_C>T	Het	c.C1481T	p.A494V	D|D,D|D|34	5.52	.	0.0006	0.00104167	Uncertain significance	.	.	1
	BMPR2	2:203420346_CT>C	Het	c.1959delT	p.P653fs	.	.	.	.	.	.	.	.	1
	BMPR2	2:203420369_G>T	Het	c.G1981T	p.E661X	.|.,.|A|43	5.78	.	.	.	Pathogenic	.	.	1
	BMPR2	2:203420525_C>A	Het	c.C2137A	p.L713I	D|P,D|D|27.4	5.97	.	.	.	.	.	.	1
	BMPR2	2:203420783_C>G	Het	c.C2395G	p.P799A	T|B,B|D|.	5.73	.	.	.	.	.	.	1
	BMPR2	2:203420921_G>T	Het	c.G2533T	p.E845X	.|.,.|A|43	6.17	.	.	.	Pathogenic	c.2533G>T | p.E845*	PMID:23590310	1
	BMPR2	2:203420952_A>C	Het	c.A2564C	p.D855A	D|D,D|D|25.8	6.17	.	.	.	.	.	.	1
	BMPR2	2:203421005_C>T	Het	c.C2617T	p.R873X	.|.,.|A|44	6.17	.	.	.	Pathogenic	c.2617C>T | p.R873*	PMID:10903931|PMID:25429696	1
	BMPR2	2:203421036_TTCTGGATCGTC>T	Het	c.2649_2659del	p.V883fs	.	.	.	.	.	.	.	.	1
	BMPR2	2:203421039_T>C	Het	c.T2651C	p.L884P	T|P,D|D|22.5	6.08	.	.	.	.	.	.	1
	BMPR2	2:203378462_C>T	Het	c.C439T	p.R147X	.|.,.|A|38	4.79	.	.	.	Pathogenic	c.439C>T | p.R147*	PMID:11115378|PMID:25612240|PMID:25525159	2
	BMPR2	2:203395678_G>A	Het	c.1128+1G>A	.	.|.,.|D|26.5	5.7	.	.	.	Pathogenic	c.1128+1G>A || c.1128+1G>T	PMID:16429395|PMID:12821254|PMID:16429395|PMID:25525159	2
	BMPR2	2:203329655_A>G	Het	c.A200G	p.Y67C	D|D,D|D|26.0	5.44	.	.	.	Pathogenic	c.200A>G | p.Y67C || c.200dupA	PMID:15146475|PMID:25688877|PMID:25187962|PMID:23579436	3
	BMPR2	2:203417497_G>A	Het	c.G1472A	p.R491Q	D|D,D|A|35	5.52	.	.	.	Pathogenic	c.1472G>A | p.R491Q	PMID:10903931|PMID:25688877|PMID:12045205	3
	BMPR2	2:203421083_C>T	Het	c.C2695T	p.R899X	.|.,.|A|39	5.3	.	.	.	Pathogenic	c.2695C>T | p.R899*	PMID:10973254|PMID:24274756|PMID:22388934	3
	BMPR2	2:203383560_C>T	Het	c.C637T	p.R213X	.|.,.|A|37	4.19	.	.	.	Pathogenic	c.637C>A | p.R213R || c.637C>T | p.R213*	PMID:24936649|PMID:15146475|PMID:24591673|PMID:25525159	4
	BMPR2	2:203417496_C>T	Het	c.C1471T	p.R491W	D|D,D|A|35	4.58	.	.	.	Pathogenic	c.1471C>T | p.R491W	PMID:10903931|PMID:19324947|PMID:25688877	8
	CAV1	7:116199267_G>A	Het	c.G463A	p.V155I	D|B,B|D|16.13	3.28	0	0.0001	0.000520833	.	c.463G>A | p.V155I	PMID:22474227	1
	EIF2AK4	15:40268738_A>T	Het	c.A1942T	p.I648F	D|D,D|D|27.0	4.88	.	.	.	.	.	.	1
	EIF2AK4	15:40293231_C>T	Het	c.C2965T	p.R989W	D|D,D|D|35	4.76	.	0	.	.	.	.	1
	EIF2AK4	15:40295412_C>T	Het	c.C3254T	p.T1085I	D|D,D|D|32	5.79	.	.	.	.	.	.	1
	EIF2AK4	15:40308871_C>T	Hom	c.C3928T	p.Q1310X	.|.,.|A|48	5.1	.	.	.	.	.	.	1
	EIF2AK4	15:40324973_G>T	Hom	c.G4744T	p.E1582X	.|.,.|A|45	4.98	.	.	.	.	.	.	1
	EIF2AK4	15:40326585_C>CAAAG	Het	c.4832_4833insAAAG	p.P1611fs	.	.	.	0.0003	0.000260417	.	.	.	1
	ENG	9:130587229_T>C	Het	c.A295G	p.I99V	T|D,D|N|23.1	4.22	.	0.0001	.	.	.	.	1
	KCNK3	2:26951420_G>A	Het	c.G1169A	p.R390H	D|D,D|D|29.5	4.73	.	.	.	Uncertain significance	.	.	1
	KCNK3	2:26950867_G>A	Het	c.G616A	p.V206M	D|D,D|D|27.9	4.9	.	.	.	.	.	.	2
	SMAD1	4:146460994_A>C	Het	c.A439C	p.N147H	T|B,P|D|23.1	4.96	0.00498339	0.0009	0.00104167	.	.	.	1
	SMAD1	4:146463797_C>T	Het	c.C722T	p.P241L	T|B,B|D|24.5	5.64	.	0.0003	.	.	.	.	1
	SMAD9	13:37422842_G>T	Het	c.C1375A	p.P459T	D|P,D|D|25.5	5.44	.	.	.	.	.	.	1
	SMAD9	13:37439778_C>T	Het	c.G899A	p.G300E	D|D,D|D|31	4.39	.	.	.	.	.	.	1
	SMAD9	13:37439890_G>A	Het	c.C787T	p.R263X	.|.,.|A|39	4.38	.	.	.	.	.	.	1
	SMAD9	13:37453654_G>A	Het	c.C173T	p.A58V	D|P,D|D|25.1	5.47	.	.	0.000260417	.	.	.	1
	TBX4	17:59533915_G>T	Het	c.G64T	p.G22X	.|.,.|A|36	2.47	.	.	.	.	.	.	1
	TBX4	17:59545007_C>T	Het	c.C538T	p.P180S	D|P,P|D|28.0	4.78	.	.	.	.	.	.	1
	TBX4	17:59556060_G>A	Het	c.G622A	p.G208S	T|D,D|D|27.6	5.94	0	0.0003	.	Likely benign	.	.	1
	TBX4	17:59557275_G>A	Het	c.G736A	p.A246T	D|D,D|D|32	5.43	.	.	.	.	.	.	1
	TBX4	17:59560263_G>T	Het	c.G1024T	p.G342C	D|B,P|D|23.1	3.28	.	.	0.000520833	.	.	.	1
	TBX4	17:59560342_G>A	Het	c.G1103A	p.R368H	D|D,D|D|33	5.51	.	0	.	.	.	.	1
	TBX4	17:59560402_CCA>C	Het	c.1164_1165del	p.P388fs	.	.	.	.	.	.	.	.	1
	TBX4	17:59560581_G>A	Het	c.G1342A	p.A448T	T|B,B|D|22.7	4.38	.	0.0002	.	.	.	.	1
	TBX4	17:59560386_T>C	Het	c.T1147C	p.C383R	T|B,B|D|.	5.51	0	0	.	.	.	.	2
	TBX4	17:59560344_T>TC	Het	c.1106dupC	p.S369fs	.	.	.	0	.	.	.	.	2
	TBX4	17:59560344_TC>T	Het	c.1106delC	p.S369fs							.		2
